# Supplementary material for: Developing an eco-physiological process-based model of soybean growth and yield (MATCRO-Soy v.1): Model calibration and evaluation
Source: Copernicus journal article supplement (doi:10.5194/egusphere-2025-453), 2025-03-21
Supplement: Supplementary file 1 [file egusphere-2025-453-supplement.pdf]

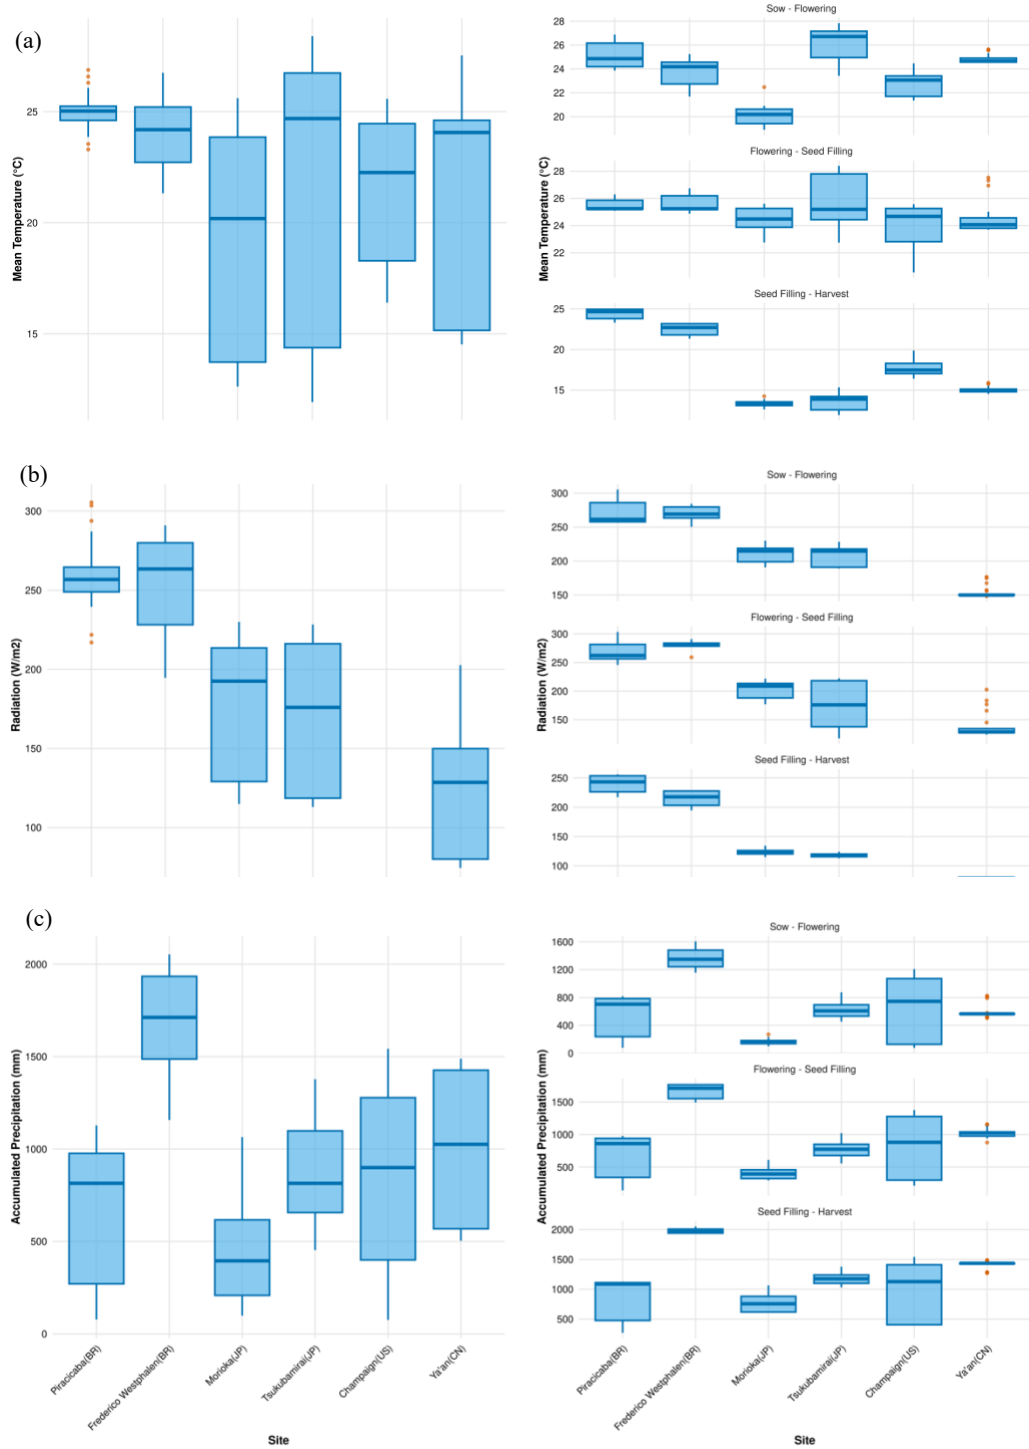

**Figure S1.** Daily average temperature (a), solar radiation (b) and total precipitation (c) during the growing season (left) and separated into the phenological stage (right) in the experimental dataset for calibration. No observation weather data of solar radiation in Champaign (US)

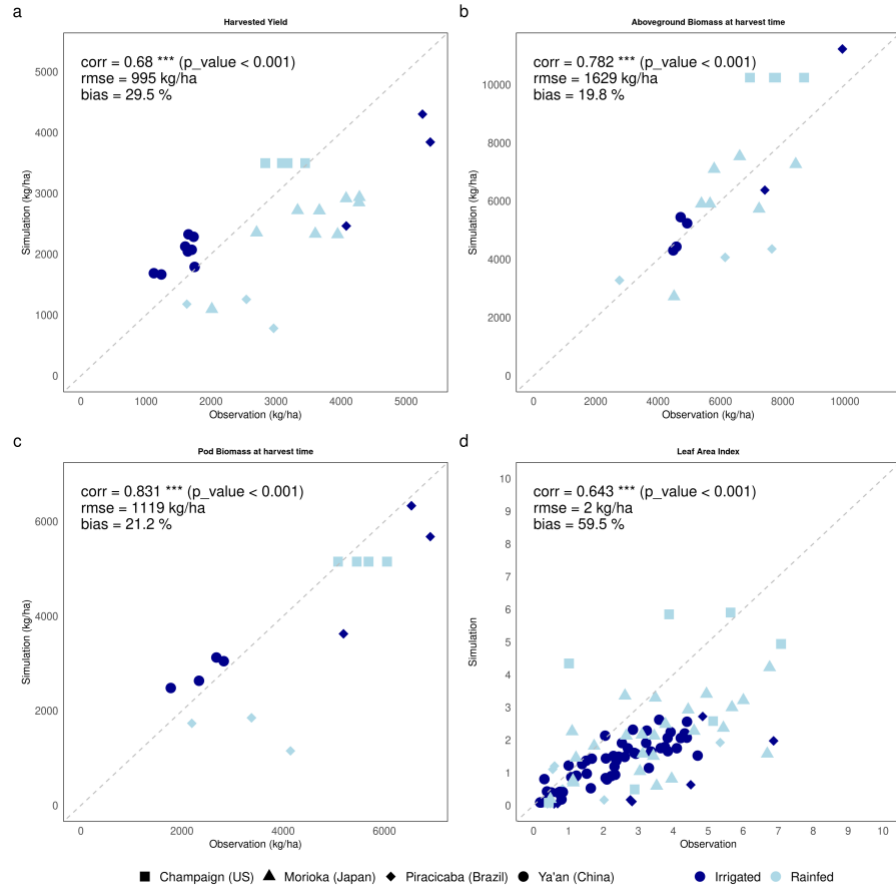

**Figure S2.** Comparison of simulated and observed soybean yield (a), aboveground biomass (b), pod (c), and leaf area index (d). The dark blue shows the data under irrigated management, while light blue shows the data under rainfed management. The shape of square represents Champaign (US) data, triangle represents Morioka (Japan), diamond represents Piracicaba (Brazil), and circle represents Ya'an (China). Calculation of statistical correlation used Pearson-correlation (corr) with \*\*\* denotes the regression is statistically significant at  $p < 0.001$ , root mean square error (RMSE), and bias.

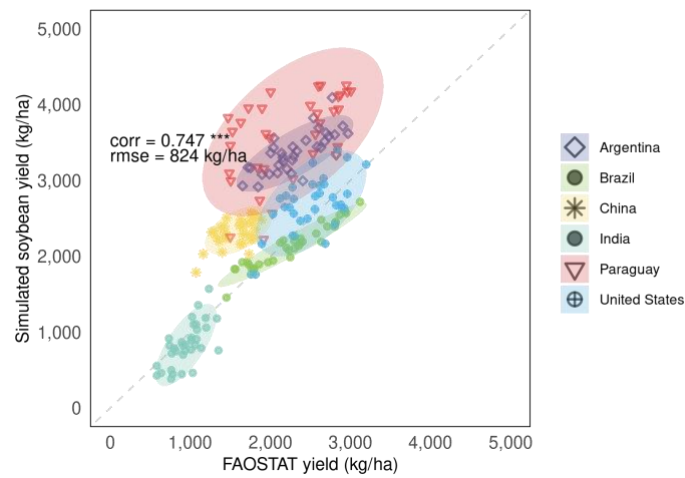

**Figure S3.** Comparison between simulated yield by MATCRO-Soy and FAOSTAT of the country mean yield during 1981-2014 in 6 major soybean producing countries (e.g., Argentina, Brazil, China, India, Paraguay, and the United States). Ellipsoid shows 90% confidence range of annual yield.

**Table S1.** Statistical comparison on model performance using components of mean squared deviation (MSD) and RMSE for global yield simulation (X) and global yield observation from FAOSTAT (Y). *n* means number of years.

| Metrics               | Squared bias (SB)       | Pearson correlation coefficient (corr)                                                                                     | Sum of difference in standard deviation (SDSD) | Lack of positive correlation (LCS) | Mean squared deviation (MSD) | Root mean square error (RMSE)                   |
|-----------------------|-------------------------|----------------------------------------------------------------------------------------------------------------------------|------------------------------------------------|------------------------------------|------------------------------|-------------------------------------------------|
| equation              | $(\bar{X} - \bar{Y})^2$ | $\frac{\sum_{i=1}^n (X_i - \bar{X})(Y_i - \bar{Y})}{\sqrt{\sum_{i=1}^n (X_i - \bar{X})^2 \sum_{i=1}^n (Y_i - \bar{Y})^2}}$ | $(SD_X - SD_Y)^2$                              | $2SD_X SD_Y (1 - corr)$            | $SB_y + SDSD_y + LCS_y$      | $\sqrt{\frac{1}{n} \sum_{i=1}^n (X_i - Y_i)^2}$ |
| Yield                 | 106,162*                | 0.810                                                                                                                      | 3,098                                          | 21,793                             | 131,053                      | 362 kg/ha                                       |
| Long term yield trend | 106,162*                | 1                                                                                                                          | 9,491                                          | 0                                  | 115,653                      | 340 kg/ha                                       |
| Detrended yield       | 0                       | 0.512                                                                                                                      | 3,405                                          | 11.996*                            | 15,400                       | 124 kg/ha                                       |

\*the metric contributed to major error in MSD components

**Table S2.** Statistical comparison on model performance in 10 major soybean-producing countries using components of mean squared deviation (MSD) and RMSE for yield.

| Countries            | SB        | Corr   | SDSD   | LCS     | MSD       | RMSE (kg/ha) |
|----------------------|-----------|--------|--------|---------|-----------|--------------|
| Argentina            | 1,106,551 | 0.730  | 8,871  | 50,303  | 1,165,725 | 1,080        |
| Bolivia              | 2,967,126 | -0.060 | 46,435 | 247,001 | 3,260,562 | 1,806        |
| <b>Brazil</b>        | 13,666    | 0.954  | 32,692 | 11,688  | 58,046    | 241          |
| Canada               | 809,166   | 0.125  | 1,071  | 181,678 | 991,916   | 996          |
| China                | 540,260   | 0.558  | 1,471  | 32,083  | 573,814   | 758          |
| <b>India</b>         | 14,461    | 0.673  | 6,957  | 35,646  | 57,065    | 239          |
| <b>Italy</b>         | 3,593     | 0.438  | 8,156  | 169,495 | 181,244   | 426          |
| Paraguay             | 1,810,520 | 0.525  | 1,138  | 278,896 | 2,090,554 | 1,446        |
| Russia               | 1,423,259 | -0.040 | 14,494 | 144,423 | 1,582,175 | 1,258        |
| <b>United States</b> | 29,982    | 0.621  | 514    | 98,832  | 129,329   | 360          |

\*country with bold font has RMSE below 500 kg/ha

**Table S3.** Statistical comparison on model performance in 10 major soybean-producing countries using components of mean squared deviation (MSD) and RMSE for detrended yield.

| Countries     | SB | Corr    | SDSD    | LCS      | MSD     | RMSE (kg/ha) |
|---------------|----|---------|---------|----------|---------|--------------|
| Argentina     | 0  | 0.541   | 5,530   | 50,291*  | 55,821  | 236          |
| Bolivia       | 0  | (0.107) | 44,881  | 246,981* | 291,853 | 540          |
| Brazil        | 0  | 0.793   | 1,962   | 10,195*  | 12,159  | 110          |
| Canada        | 0  | (0.035) | 2,325   | 179,582* | 181,907 | 427          |
| China         | 0  | 0.136   | 54      | 29,840*  | 29,894  | 173          |
| India         | 0  | 0.544   | 12,461  | 30,045*  | 42,505  | 206          |
| Italy         | 0  | 0.442   | 11,129  | 171,508* | 171,508 | 414          |
| Paraguay      | 0  | 0.562   | 9,425   | 224,938* | 234,363 | 484          |
| Russia        | 0  | 0.277   | 49,821* | 47,357*  | 97,179  | 312          |
| United States | 0  | 0.600   | 29,242  | 46,165*  | 75,407  | 275          |

\*the metric contributed to major error in MSD components

**Table S4.** Statistical comparison on model performance in 10 major soybean-producing countries using components of mean squared deviation (MSD) and RMSE for long-term trend.

| Countries     | SB*       | Corr | SDSD    | LCS    | MSD       | RMSE (kg/ha) |
|---------------|-----------|------|---------|--------|-----------|--------------|
| Argentina     | 1,106,551 | 1    | 3,351   | 0      | 1,109,902 | 1,054        |
| Bolivia       | 2,967,126 | 1    | 1,575   | 0      | 2,968,701 | 1,723        |
| Brazil        | 13,666    | 1    | 32,213* | 0      | 45,879    | 214          |
| Canada        | 809,166   | 1    | 838     | 0      | 810,004   | 900          |
| China         | 540,260   | 1    | 3,665   | 0      | 543,925   | 738          |
| India         | 14,461    | 1    | 103     | 0      | 14,565    | 121          |
| Italy         | 3,593     | 1    | 6,131*  | 0      | 9,725     | 99           |
| Paraguay      | 1,810,520 | 1    | 45,621  | 0      | 1,856,141 | 1,362        |
| Russia        | 1,423,259 | -1   | 14,406  | 47,330 | 1,437,664 | 1,199        |
| United States | 29,982    | 1    | 23,954* | 0      | 53,936    | 232          |

\*the metric contributed to major error in MSD components

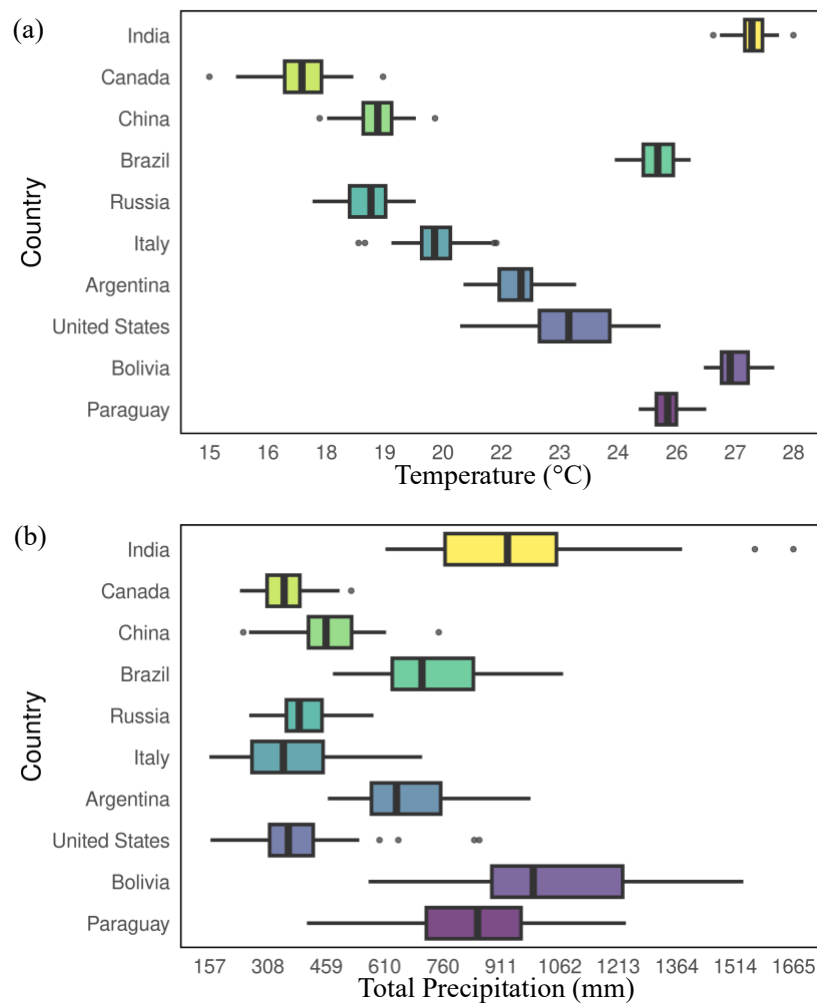

**Figure S4.** Daily average temperature (a) and total precipitation (b) during the growing season in 10 major soybean-producing countries averaged from 1981-2014 in the represented specific point-scale.

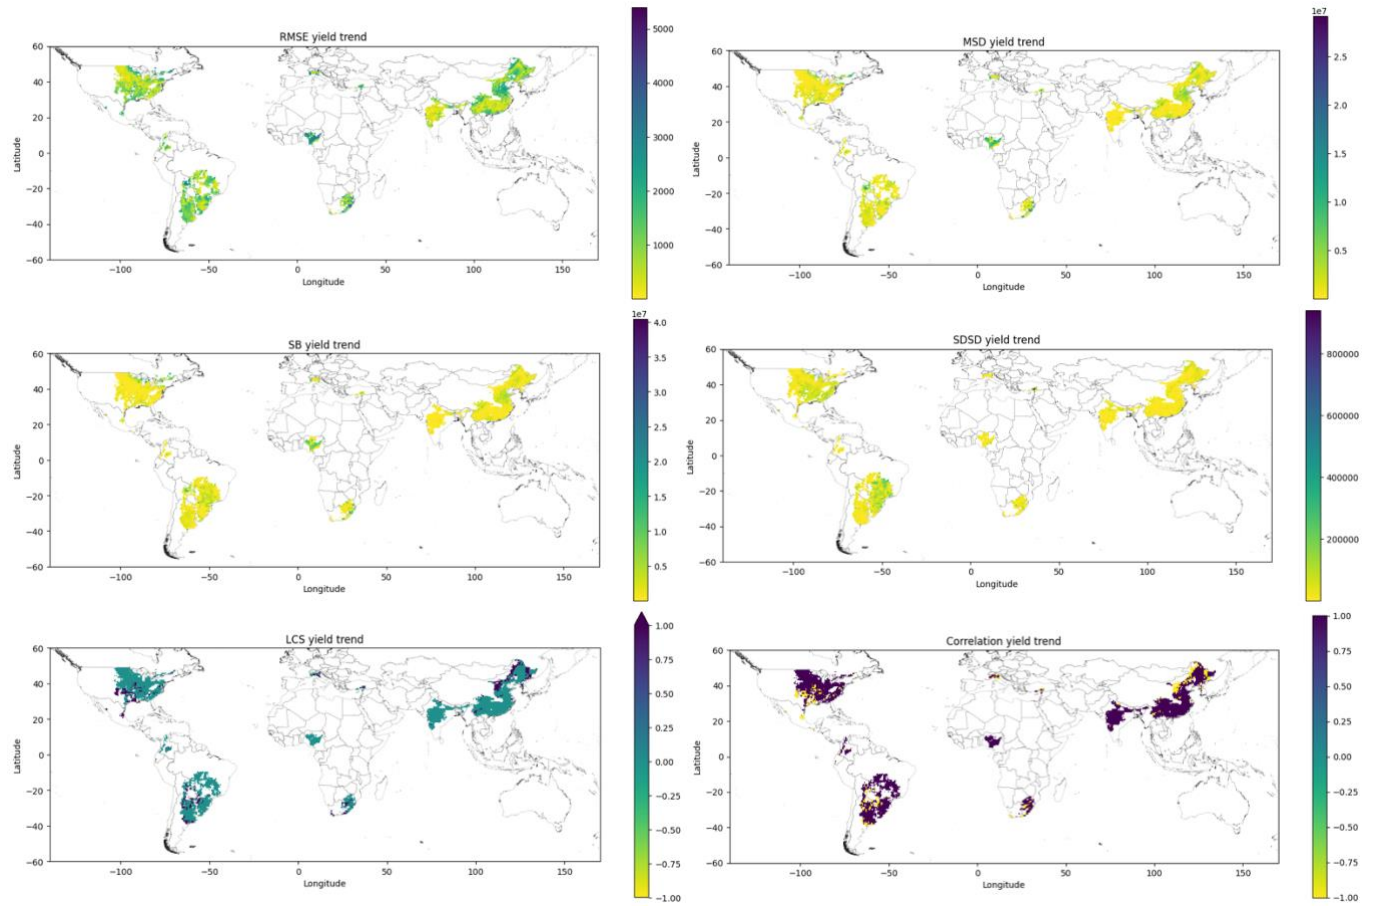

**Figure S5.** RMSE and MSD components of long-term yield trend between MATCRO-Soy and GDHY dataset during 1980-2014. Major contributor in MSD components is squared bias (SB).

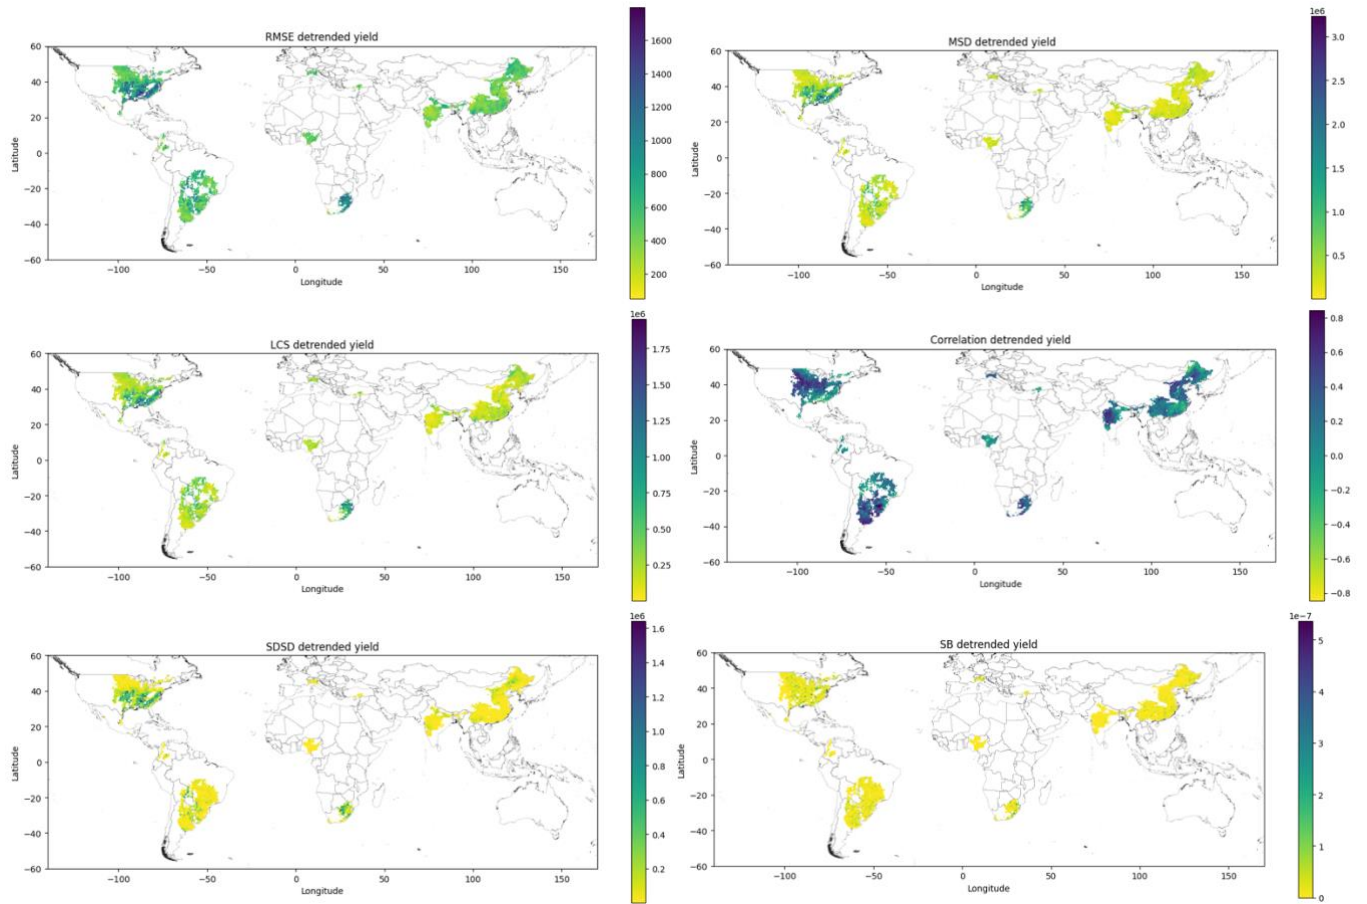

**Figure S6.** RMSE and MSD components of detrended yield between MATCRO-Soy and GDHY dataset during 1980-2014. Major contributor of error in MSD components is LCS where mostly higher in South Africa, southeastern of the United States, Bolivia, and Paraguay
